# Supplementary material for: Randomized-controlled phase II trial of salvage chemotherapy after immunization with a TP53-transfected dendritic cell-based vaccine (Ad.p53-DC) in patients with recurrent small cell lung cancer
Source: Springer Nature journal article supplement (doi:10.1007/s00262-018-2287-9), 2018-12-27
Supplement: MOESM1 [file 16359544]

**Supplemental Figure 1**

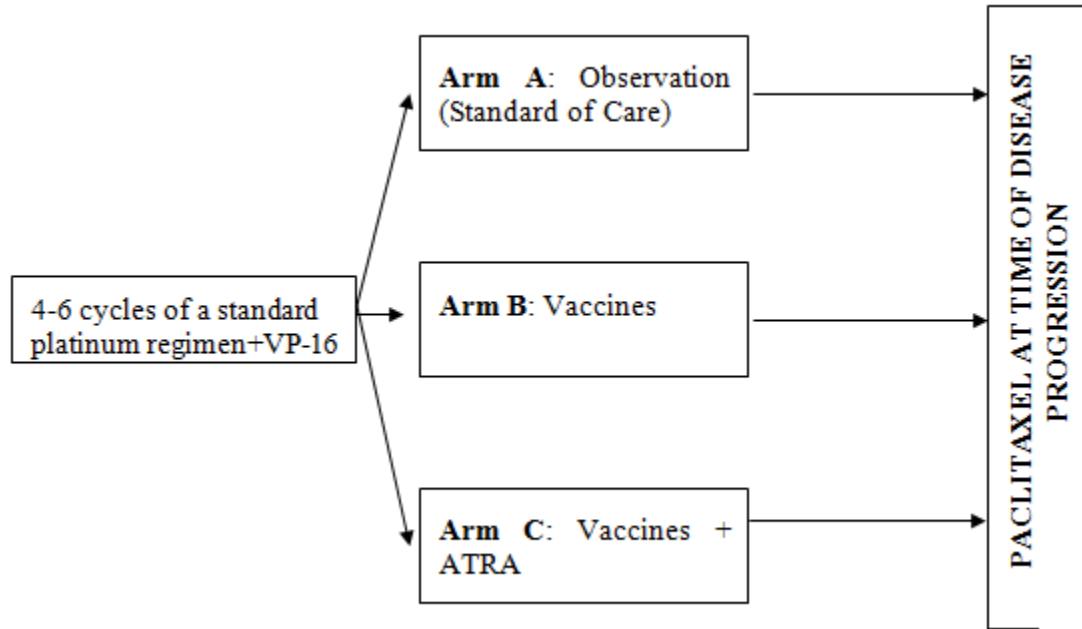

Study design diagram showing treatment received by patients in each study arm. Abbreviations: ATRA, all-trans-retinoic acid; VP-16, etoposide.

## Supplemental Figure 2

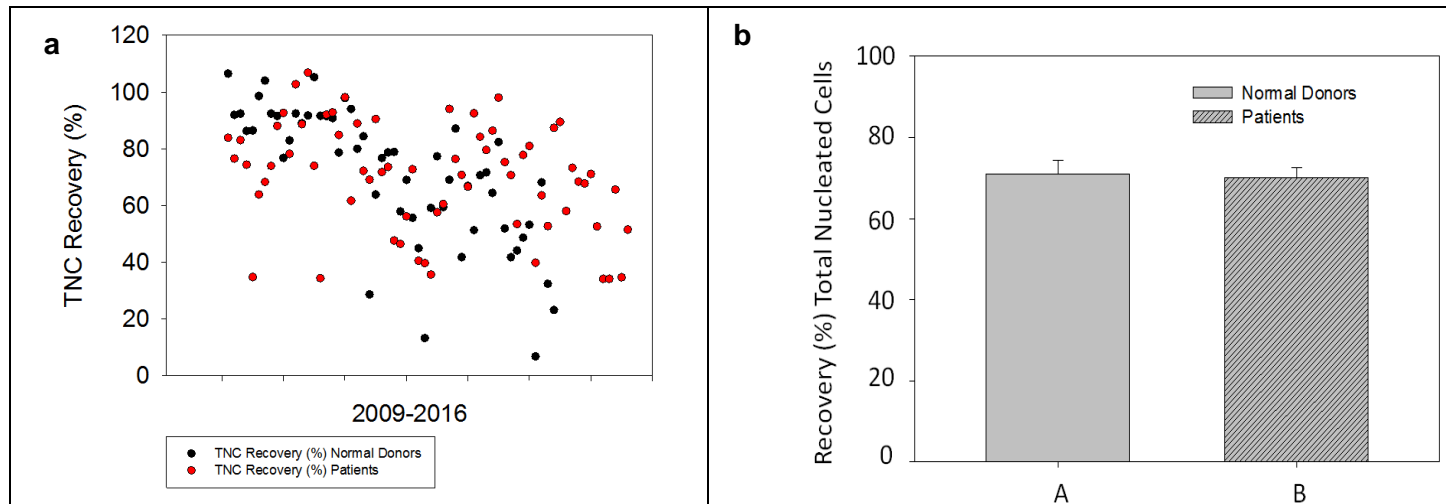

Total nucleated cell (TNC) recovery percentages. **a** Black dots represent normal donors ( $n = 54$ ) and red dots represent patients ( $n = 66$ ) who underwent a standard 4-blood-volume apheresis procedure. **b** Graph shows percentages of TNCs for normal donors (A) and patients (B). The apheresis products were subjected to ficoll separation using a Haemonetics Cell Saver 5+ automated cell recovery system to prepare an enriched mononuclear cell preparation. Data are expressed as means  $\pm$  SEMs percent recovery of total nucleated cells, following ficoll separation of apheresis products from normal donors versus patients ( $71 \pm 3\%$  versus  $70 \pm 2\%$ ,  $P = .511$ , respectively).

### CONSORT Flow Diagram

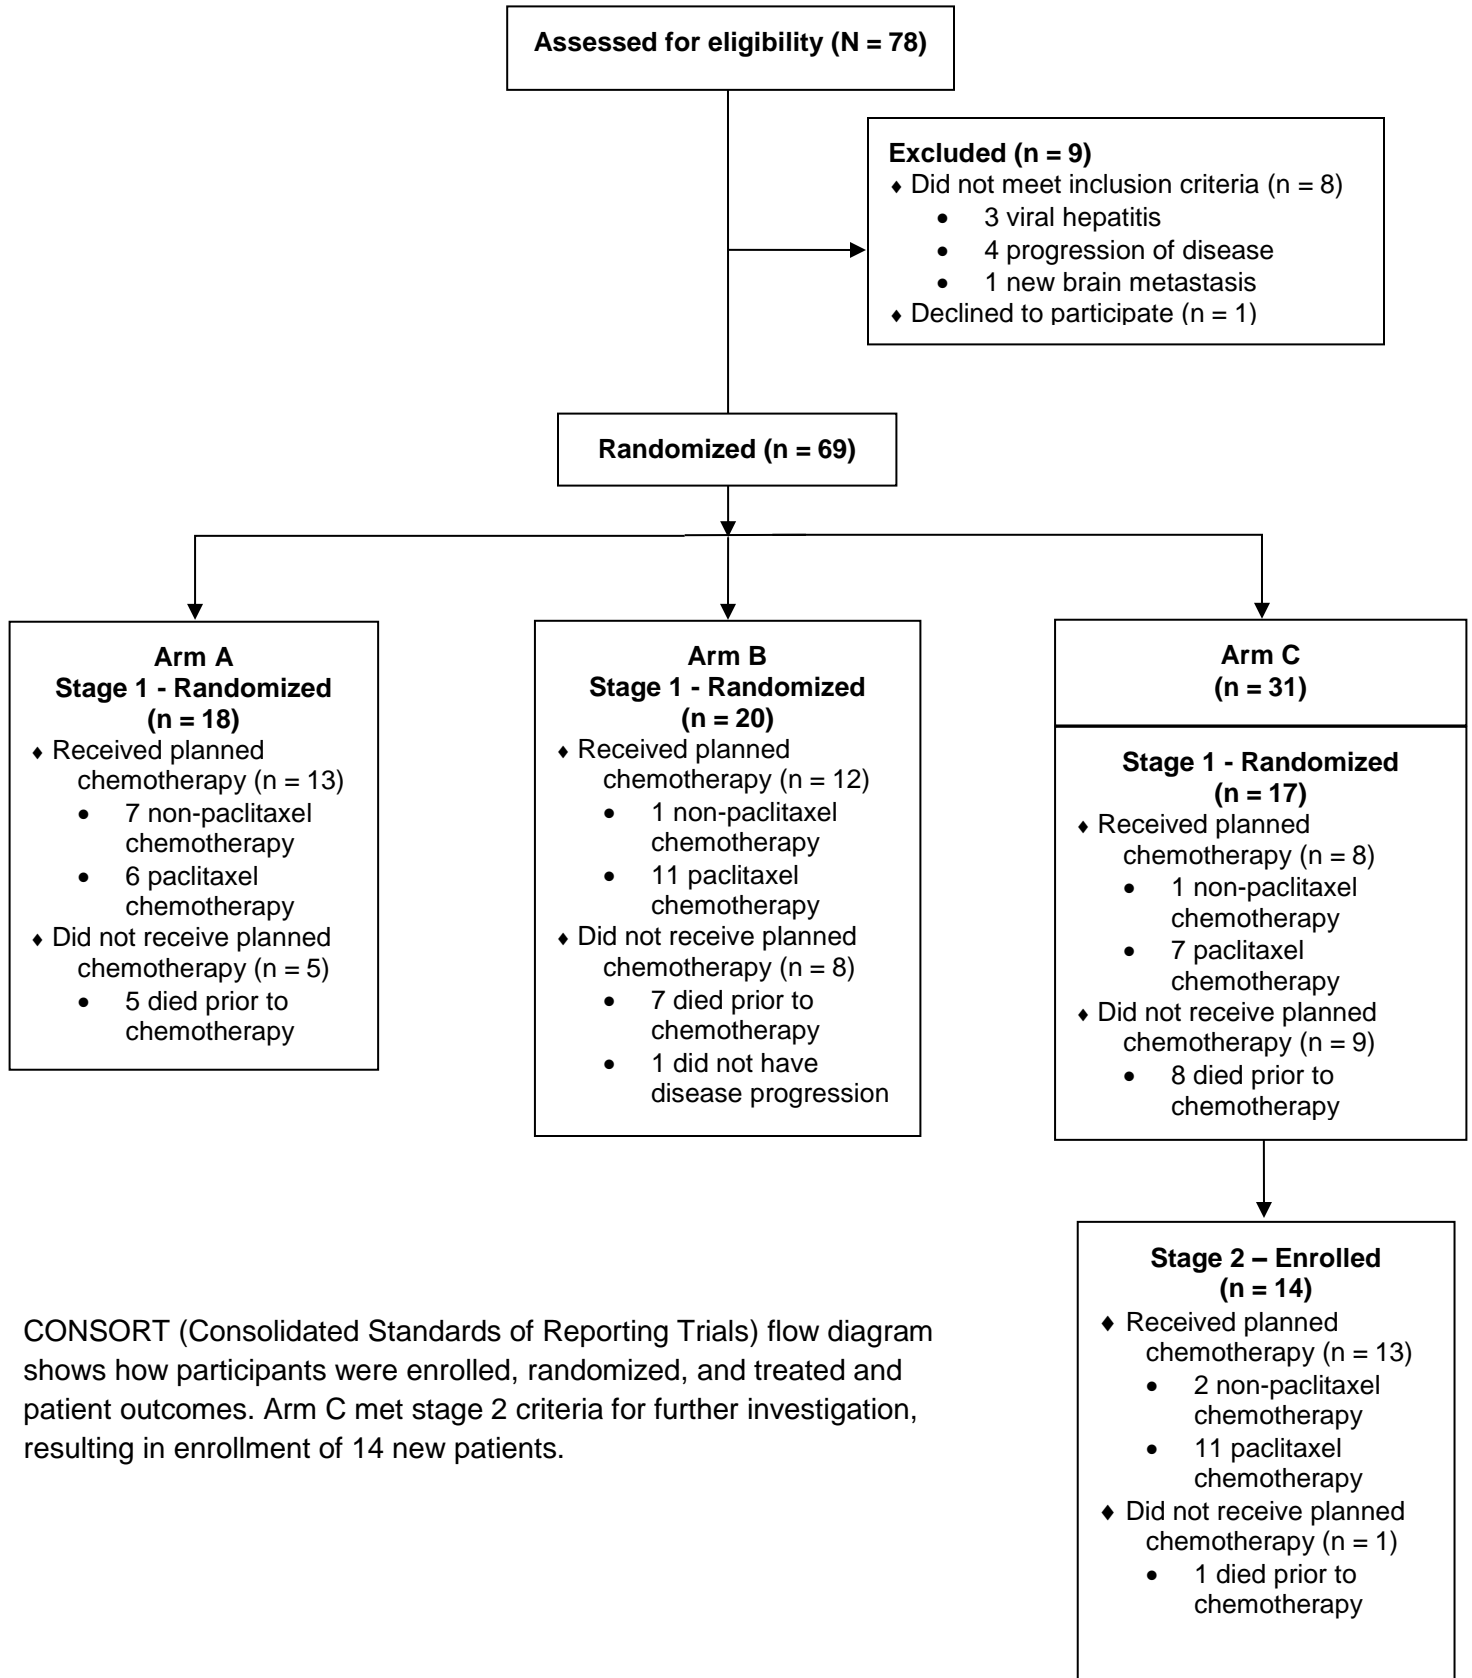

CONSORT (Consolidated Standards of Reporting Trials) flow diagram shows how participants were enrolled, randomized, and treated and patient outcomes. Arm C met stage 2 criteria for further investigation, resulting in enrollment of 14 new patients.

**Supplemental Table 1 Adverse events by study arm**

| Adverse Events                                                  | Arm A   |    |    |          |          |                | Arm B  |    |    |        |          |                | Arm C  |    |    |        |          |                | Totals (Arms A, B, and C) |    |    |        |          |                |
|-----------------------------------------------------------------|---------|----|----|----------|----------|----------------|--------|----|----|--------|----------|----------------|--------|----|----|--------|----------|----------------|---------------------------|----|----|--------|----------|----------------|
|                                                                 | N = 18* |    |    | n = 16** |          |                | N = 20 |    |    | n = 17 |          |                | N = 31 |    |    | n = 31 |          |                | N = 69                    |    |    | n = 64 |          |                |
|                                                                 | G1      | G2 | G3 | G4       | G3+4 (%) | Total, No. (%) | G1     | G2 | G3 | G4     | G3+4 (%) | Total, No. (%) | G1     | G2 | G3 | G4     | G3+4 (%) | Total, No. (%) | G1                        | G2 | G3 | G4     | G3+4 (%) | Total, No. (%) |
| <b>Laboratory-Metabolic/Chemistries</b><br>Alkaline phosphatase | 1       |    | 1  |          | 5.6      | 2 (11.1)       |        |    |    |        | 0        |                | 3      | 1  |    |        | 0        | 4 (12.9)       | 4                         | 1  | 1  |        | 1.4      | 6 (8.7)        |
| <b>Laboratory-Hematologic</b><br>Lymphopenia                    |         |    | 1  |          | 5.6      | 1 (5.6)        |        |    |    |        | 0        |                | 1      | 1  |    | 1      | 3.2      | 3 (9.7)        | 1                         | 1  | 1  | 1      | 2.9      | 4 (5.8)        |
| Platelets                                                       | 1       |    |    |          | 0        | 1 (5.6)        | 3      |    |    |        | 0        | 3 (15.0)       | 4      |    | 3  |        | 9.7      | 7 (22.6)       | 8                         |    | 3  |        | 4.3      | 11 (15.9)      |
| <b>Constitutional</b><br>Anorexia                               | 4       | 2  | 1  |          | 5.6      | 7 (38.9)       | 5      |    |    |        | 0        | 5 (25.0)       | 10     | 2  |    |        | 0        | 12 (38.7)      | 19                        | 4  | 1  |        | 1.4      | 24 (34.8)      |
| Fatigue (asthenia, lethargy, malaise)                           | 5       | 2  | 2  |          | 11.1     | 9 (50.0)       | 9      | 3  | 1  |        | 5.0      | 13 (65.0)      | 14     | 6  | 2  |        | 6.5      | 22 (71.0)      | 28                        | 11 | 5  |        | 7.2      | 44 (63.8)      |
| Fever <sup>†</sup>                                              | 1       |    | 1  |          | 5.6      | 2 (11.1)       | 1      |    |    |        | 0        | 1 (5.0)        | 1      |    |    |        | 0        | 1 (3.2)        | 3                         |    | 1  |        | 1.4      | 4 (5.8)        |
| <b>Respiratory</b><br>Dyspnea                                   | 5       | 2  | 2  |          | 11.1     | 9 (50.0)       | 4      | 6  | 1  |        | 5.0      | 11 (55.0)      | 7      | 7  | 1  |        | 3.2      | 15 (48.4)      | 16                        | 15 | 4  |        | 5.8      | 35 (50.7)      |
| <b>Gastrointestinal</b><br>Vomiting                             |         |    | 1  |          | 5.6      | 1 (5.6)        | 1      | 1  |    |        | 0        | 2 (10.0)       | 6      | 2  | 1  |        | 3.2      | 9 (29.0)       | 7                         | 3  | 2  |        | 2.9      | 12 (17.4)      |
| <b>Neurologic and Psychiatric</b><br>Pain- Headache             | 3       |    | 1  |          | 5.6      | 4 (22.2)       | 3      |    | 1  |        | 5.0      | 4 (20.0)       | 19     | 2  | 4  |        | 12.9     | 25 (80.6)      | 25                        | 2  | 6  |        | 8.7      | 33 (47.8)      |
| Dizziness                                                       | 3       |    | 1  |          | 5.6      | 4 (22.2)       | 1      |    |    |        | 0        | 1 (5.0)        | 2      | 1  |    |        | 0        | 3 (9.7)        | 6                         | 1  | 1  |        | 1.4      | 8 (11.6)       |
| Confusion                                                       |         |    | 1  |          | 5.6      | 1 (5.6)        |        | 1  |    |        | 0        | 1 (5.0)        |        |    |    |        | 0        |                |                           | 1  | 1  |        | 1.4      | 2 (2.9)        |
| Seizure                                                         |         | 1  | 1  |          | 5.6      | 2 (11.1)       |        |    |    |        | 0        |                |        |    |    |        | 0        |                |                           | 1  | 1  |        | 1.4      | 2 (2.9)        |
| <b>Cutaneous</b><br>Alopecia (scalp or body)                    |         | 3  |    |          | 0        | 3 (16.7)       | 1      | 1  | 1  |        | 5.0      | 3 (15.0)       | 2      | 6  |    |        | 0        | 8 (25.8)       | 3                         | 10 | 1  |        | 1.4      | 14 (20.3)      |
| <b>Pain</b><br>Pain- Extremity/limb                             | 1       | 2  |    |          | 0        | 3 (16.7)       | 3      |    |    |        | 0        | 3 (15.0)       |        | 4  | 1  | 1      | 6.5      | 6 (19.4)       | 4                         | 6  | 1  | 1      | 2.9      | 12 (17.4)      |
| Pain- Bone                                                      |         |    |    |          | 0        |                |        |    |    |        |          |                | 4      | 1  | 2  |        | 6.5      | 7 (22.6)       | 4                         | 1  | 2  |        | 2.9      | 7 (10.1)       |

\*N = no. of patients in arm; \*\*n = no. of patients who experienced adverse events; <sup>†</sup>Fever defined in the absence of neutropenia, where neutropenia is defined as absolute neutrophil count < 1.0 x 10e9/L. Abbreviation: G, grade.

**Supplemental Table 2** Patient overall response rates to second-line chemotherapy

| Arm, Stage                                                                       | Randomize/<br>Enrolled, n | Did Not Receive Salvage<br>Chemo Tx, no. |          |                  | Tx with Salvage Chemo, no. |    |    |     |               |                |    |    |     |               |       | ORR #1,<br>n/N*, %<br>(range, 95% CI) | ORR #2,<br>n/N**, %<br>(range, 95% CI) | ORR #3,<br>n/N†, %<br>(range, 95% CI) | ORR #4,<br>n/N‡, %<br>(range, 95% CI) |
|----------------------------------------------------------------------------------|---------------------------|------------------------------------------|----------|------------------|----------------------------|----|----|-----|---------------|----------------|----|----|-----|---------------|-------|---------------------------------------|----------------------------------------|---------------------------------------|---------------------------------------|
|                                                                                  |                           |                                          |          |                  | Paclitaxel                 |    |    |     |               | Non-paclitaxel |    |    |     |               | Total |                                       |                                        |                                       |                                       |
|                                                                                  |                           | Died                                     | Survived | Total<br>Treated | PR                         | SD | PD | UnV | Sub-<br>total | PR             | SD | PD | UnV | Sub-<br>total |       |                                       |                                        |                                       |                                       |
| A, 1                                                                             | 18                        | 5                                        | 0        | 5                | 2                          | 4  | 0  | 0   | 6             | 0              | 2  | 1  | 4   | 7             | 13    | 2/18, 11.1<br>(1.9, 36.1)             | 2/13, 15.4 (2.7,<br>46.3)              | 2/6, 33.3 (6.0,<br>75.9)              | 0/7, 0.0 (0.0,<br>43.9)               |
| B, 1                                                                             | 20                        | 7                                        | 1        | 8                | 1                          | 3  | 6  | 1   | 11            | 1              | 0  | 0  | 0   | 1             | 12    | 2/20, 10.0 (1.8,<br>33.1)             | 2/12, 16.7<br>(2.9, 49.1)              | 2/11, 18.2 (3.2,<br>52.2)             | 1/1, 100 (5.5,<br>100.0)              |
| C, 1 & 2                                                                         | 31                        | 9                                        | 1        | 10               | 5                          | 5  | 8  | 0   | 18            | 0              | 2  | 0  | 1   | 3             | 21    | 5/31, 16.1 (6.1,<br>34.5)             | 5/21, 23.8 (9.1,<br>47.5)              | 5/18, 27.8 (10.7,<br>53.6)            | 0/3, 0.0<br>(0.0, 69.0)               |
| C, 1                                                                             | 17                        | 8                                        | 1        | 9                | 3                          | 2  | 2  | 0   | 7             | 0              | 0  | 0  | 1   | 1             | 8     | 3/17, 17.6<br>(4.7, 44.2)             | 3/8, 37.5<br>(10.2, 74.1)              | 3/7, 42.9<br>(11.8, 79.8)             | 0/1, 0.0<br>(0.0, 94.5)               |
| C, 2                                                                             | 14                        | 1                                        | 0        | 1                | 2                          | 3  | 6  | 0   | 11            | 0              | 2  | 0  | 0   | 2             | 13    | 2/14, 14.3<br>(2.5, 43.8)             | 2/13, 15.4<br>(2.7, 46.3)              | 2/11, 18.2<br>(3.2, 52.2)             | 0/2, 0.0<br>(0.0, 80.2)               |
| All (Totals)                                                                     | 69                        | 21                                       | 2        | 23               | 8                          | 12 | 14 | 1   | 35            | 1              | 4  | 1  | 5   | 11            | 46    | 9/69, 13.0<br>(6.5, 23.8)             | 9/46, 19.6<br>(9.9, 34.4)              | 8/35, 22.9<br>(11.0, 40.6)            | 1/11, 9.1<br>(0.5, 42.9)              |
| †P values for <b>stage 1 responses only</b> , calculated using Fisher exact test |                           |                                          |          |                  |                            |    |    |     |               |                |    |    |     |               |       | .779                                  | .485                                   | .529                                  | .222                                  |

Abbreviations: ORR, overall response rate; PD, progressive disease; PR, partial response; SD, stable disease; Tx, treatment; UnV, unevaluable.

\*Response/all randomized; \*\*Response/treated only; †Response/paclitaxel-treated only; ‡Response/non-paclitaxel-treated only.

Overall response rates (ORR) to second-line chemotherapy. Arm C met stage 2 criteria for further investigation, and 14 new patients were enrolled in Arm C, Stage 2. ORR #1 is the response rate for all patients who were randomized to the trial. ORR#2 is the response rate for treated patients only. ORR #3 is the response rate for paclitaxel-treated patients. ORR #4 is the response rate for patients who were treated with a second-line chemotherapy other than paclitaxel.

**Supplemental Table 3** Survival estimates

| <b>Survival Criteria</b>                            | <b>Arm/Cohort</b> | <b>Patients, No.</b> | <b>Median Survival, Mo</b> | <b>Range,* Mo</b> | <b>P Value</b> |
|-----------------------------------------------------|-------------------|----------------------|----------------------------|-------------------|----------------|
| Survival from date of progression after vaccination | A                 | 18                   | 7.40                       | 3.37-16.70        | .065           |
|                                                     | B                 | 20                   | 2.73                       | 2.03-7.20         |                |
|                                                     | C                 | 31                   | 3.23                       | 1.97-7.53         |                |
| Survival from date of study enrollment              | A                 | 18                   | 12.18                      | 9.27-18.33        | .313           |
|                                                     | B                 | 20                   | 6.32                       | 5.13-13.93        |                |
|                                                     | C                 | 31                   | 6.20                       | 4.17-11.57        |                |
| Survival based on immune response                   | Negative          | 30                   | 9.28                       | 6.20-15.00        | .250           |
|                                                     | Positive          | 13                   | 9.23                       | 4.73-NA           |                |

\*95% confidence interval
